# Supplementary material for: Scalable spatiotemporal prediction with Bayesian neural fields
Source: PubMed Central journal article supplement — Nat Commun. 2024 Sep 11;15:7942. doi: 10.1038/s41467-024-51477-5 (PMC11390735; doi:10.1038/s41467-024-51477-5), 2024-09-11
Supplement: 41467_2024_51477_MOESM2_ESM.pdf [file 41467_2024_51477_MOESM2_ESM.pdf]

## **Description of Additional Supplementary Files**

File Name: Supplementary Code 1

Description: The source code of bayesnf v0.1.3
